# Supplementary material for: Fetal Sacrococcygeal Immature Teratoma: A Case Report and A Literature Review
Source: Research Square preprint supplement (doi:10.21203/rs.3.rs-6232097/v1), 2025-04-21
Supplement: Supplementary file 1 [file f2cda62b0d5b78354e32ea65.xlsx]

## Sheet: Sheet1
ID	Prognosis	First author	GA	Delivery weeks	Delivery days	Tumor nature	Tumor type	Tumor size	Max tumor size	Hyper Vascularization (Yes/No)	Histopathology	Maternal Clinical features	Time of death	Cause of fatal death/Discharged date
D01	Dead	MĂDĂLINA9	27	18w	126	Solid,with focal cystic	type II	3.3/3.0cm	3.3	yes	Immature teratoma	Placental hypoposition,placental abruption,Vaginal bleeding	Intrauterine death	No heartbeat, Premature delivery
D02	Dead	MĂDĂLINA9	26	22w	154	Solid,with cystic foci	type I	8.5/5.5 cm	8.5	yes	Immature teratoma	Abdominal pain, metrorrhagia	Intrauterine death	Premature delivery, Premature rupture of membrane
D03	Dead	T. VAN MIEGHEM10	33	26+4w	186	Solid	type II	13.1×10.1×11.8cm	13.1	yes	Immature teratoma	cardiac instability	3 days of age	prematurity, hemodynamic instability.
D04	Dead	Shinobu Goto11	22	27+1	190	Solid, tumor ruptured,bleeding	type II	16 ×14 × 8 cm	16	yes	Immature teratoma	Polyhydramnios,uterinecontraction,mirror syndrome	first day after surgery	fetal subcutaneous edema
D05	Dead	Ivana MARKOVIĆ12	21	22w	154	Solid	type II	6.2x5.0cm	6.2	yes	Immature teratoma	Severepain, polyhydramnios	Termination pregnancy	Rapid tumor growth, fetus immaturity
D06	Dead	Case in this study	35	33w	231	Solid, Tumor rupture, bleeding	type I	13x11x8cm	13	yes	Immature teratoma	Excessive and bloody amniotic fluid, enlarged placenta, severe abdominal pain, vaginal bleeding	3 days of age	Severe fetal distress, cardiovascular instability, heart failure
S01	Alive	Aloui H13	32	37w	259	Solid-cystic,	type I	35x40x20cm	35	yes	No mentioned	Gestational diabetes, polyhydramnios	Cesarean delivery, Excised tumor and coccyx	15th day
S02	Alive	Brillantino C14	28	37w	259	solid with cystic foci	type I	17x11.5 x12cm	17	yes	Immature teratoma with foci of yolk sac tumor	Neonatal atrial septal defect, elevated AFP	Cesarean delivery, Excised tumor and coccyx	45th
S03	Alive	Bista A15	35	36+3w	255	solid with cystic foci	type I	10.3×7.4×9.7cm	10.3	yes	Mature teratoma	wound infection, wound gaping	Cesarean delivery, Excised tumor	25th
S04	Alive	Shinobu Goto16	-	-		Solid-cystic	type I	18 ×17 cm	18	yes	Immature teratoma	Overweight, consanguineous parents	Cesarean delivery, Excised tumor	7th
S05	Alive	Guitart J17	--	35w	245	Solid-cystic	type I	19x15 cm	19	yes	Immature teratoma	Premature rupture of membranes, ulcerations and bleeding on tumor,s surface	Preoperative endovascular embolization, exercising tumor and coccyx	25th
S06	Alive	Toms A18	--	39w	273	Solid-cystic, tumor rupture	type II	-		yes	a benign fetiform teratoma	-	Preoperative ligation of the tumor's supplying artery, excised tumor and coccyx	Estimated at about 25th
S07	Alive	Ahmad M19	25	34	238	Cystic	type II	-		yes	Mature teratoma	Fatal acute renal failure, hydronephrosis	Stagely excised tumor and coccyx	Discharged after the recovery of physical indicators
S08	Alive	Yannick20	-	36	252	Multic-cyctic mass	type IV	30x13cm	30	no	Mature teratoma	AFP slightly increased	excised tumor and coccyx	Discharged after the recovery of physical indicators
S09	Alive	Baró AM21	26	35	245	Solid-cystic,	type I	19x15cm	19	yes	immature teratoma, male fatus	severe polyhydramnios, gestational diabetes, premature rupture of membranes, AFP markly increased	Cesarean section, embolization of the middle sacral artery, Excision of tumor and coccyx	25th
S10	Alive	Alani MA22	28	35	245	Solid-cystic	type I	18×11×16cm	18	yes	Immature teratoma with malignant foci	Fetal distress, Tumor rupture and minor bleeding, bloody amniotic fluid	Cesarean section, Excision of the tumor and coccyx, Postoperative chemotherapy	Discharged after the recovery of physical indicators
S11	Alive	Takamatsu M23	29	29+3	206	Solid-cystic,	type I	6x3x3cm	6	yes	Immature teratoma	Fetal distress, Premature delivery, low birth weight	Cesarean section, Excision of the tumor	discharged after a normal weight
		Type I	Type II	Type IV
	Dead	2	4	0
	Alive	8	2	1
		Type I	Type II	Type IV
	Dead	33.3333	66.6667	0
	Alive	72.7273	18.1818	9.09091
		Immature	Mature	Malignant
	Dead	6	0	0
	Alive	7	3	1
		Immature	Mature	Malignant
	Dead	100	0	0
	Alive	63.6364	27.2727	9.09091
